# Supplementary material for: Identifying Risk Profiles of Malignant Prostate Cancer Surgical Delay Using a Person-Centered Approach to Understand Prostate Cancer Disparities: The Constellation of Health Determinants Using Latent Class Analysis on Cancer Registry Data
Source: PubMed Central journal article supplement — Am J Mens Health. 2020 Dec 29;14(6):1557988320984282. doi: 10.1177/1557988320984282 (PMC7783683; doi:10.1177/1557988320984282), 2020-12-29
Supplement: sj-pdf-1-jmh-10.1177_1557988320984282.pdf [file sj-pdf-1-jmh-10.1177_1557988320984282.pdf]

Mplus VERSION 8.4  
MUTHEN & MUTHEN

INPUT INSTRUCTIONS

TITLE: TDH PCa surgery delay 3-class solution: 4 delay cat

DATA: FILE IS "C:\Users\...\ TDH\_LCA\_PCA\_11092020.csv";

VARIABLE: NAMES ARE ID, AgeCat, Race, MaritC, InsC, Appal, Derived,  
Grade1, Grade2, Grade3, Grade4, Delay4;

USEOBSERVATIONS = (Derived==0);

USEVARIABLES ARE AgeCat Race MaritC Appal InsC Delay4;

CLASSES = c(3);

CATEGORICAL = AgeCat Race MaritC Appal InsC Delay4;

IDVAR IS ID;

MISSING = .;

AUXILIARY = (r3step) Grade2 Grade3 Grade4;

ANALYSIS:

type = mixture missing;

STARTS = 0;

OPTSEED = 991329;

LRTSTARTS = 0 0 500 200;

OUTPUT: SAMP stand cint tech11 tech14;
